# Supplementary material for: Zero-charged catanionic lamellar liquid crystals doped with fullerene C60 for potential applications in tribology
Source: Royal Society of Chemistry journal article supplement (doi:10.1039/c7sm00800g), 2017-01-01
Supplement: c7sm00800g1.pdf [file c7sm00800g1.pdf]

Supporting Information for

## **Zero-Charged Catanionic Lamellar Liquid Crystals Doped with Fullerene C<sub>60</sub> for Potential Applications in Tribology**

Mengjun Chen,<sup>a,b</sup> Baoyong Liu,<sup>b</sup> Xiaolin Wang,<sup>a</sup> Yanxu Fu,<sup>a</sup> Jingcheng Hao,<sup>a,\*</sup> and Hongguang Li<sup>b,\*</sup>

<sup>a</sup>Key Laboratory of Colloid and Interface Chemistry & Key Laboratory of Special Aggregated Materials, Shandong University, Ministry of education, Jinan, Shandong Province, 250100, China;

<sup>b</sup>Laboratory of Clean Energy Chemistry and Materials, Lanzhou Institute of Chemical Physics, Chinese Academy of Sciences, Lanzhou, Gansu Province, 730000, China.

---

\*Corresponding Author

hgli@licp.cas.cn      Tel: +86-0931-4968829      Fax: +86-0931-4968163

jhao@sdu.edu.cn      Tel: +86-0531-88366074      Fax: +86-0531-88364750

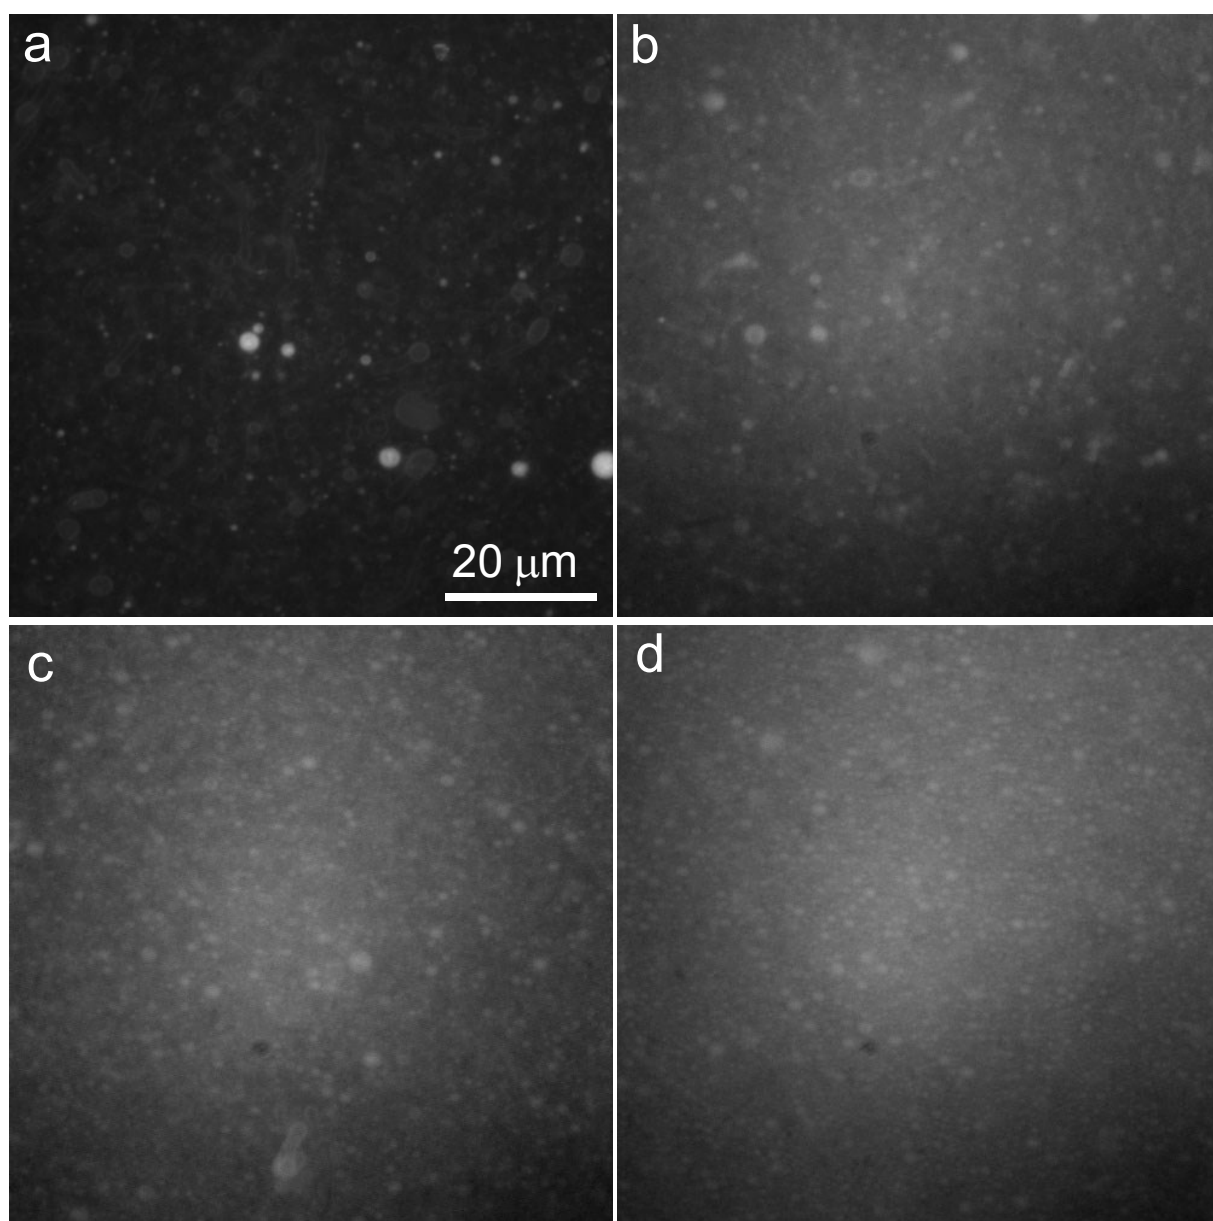

**Fig. S1** Fluorescence microscopy images for TTAO aqueous solutions with concentrations to be 0.5 wt% (a), 2.5 wt% (b), 3 wt% (c) and 4 wt% (d), respectively. The magnification of image b-d is the same with image a.

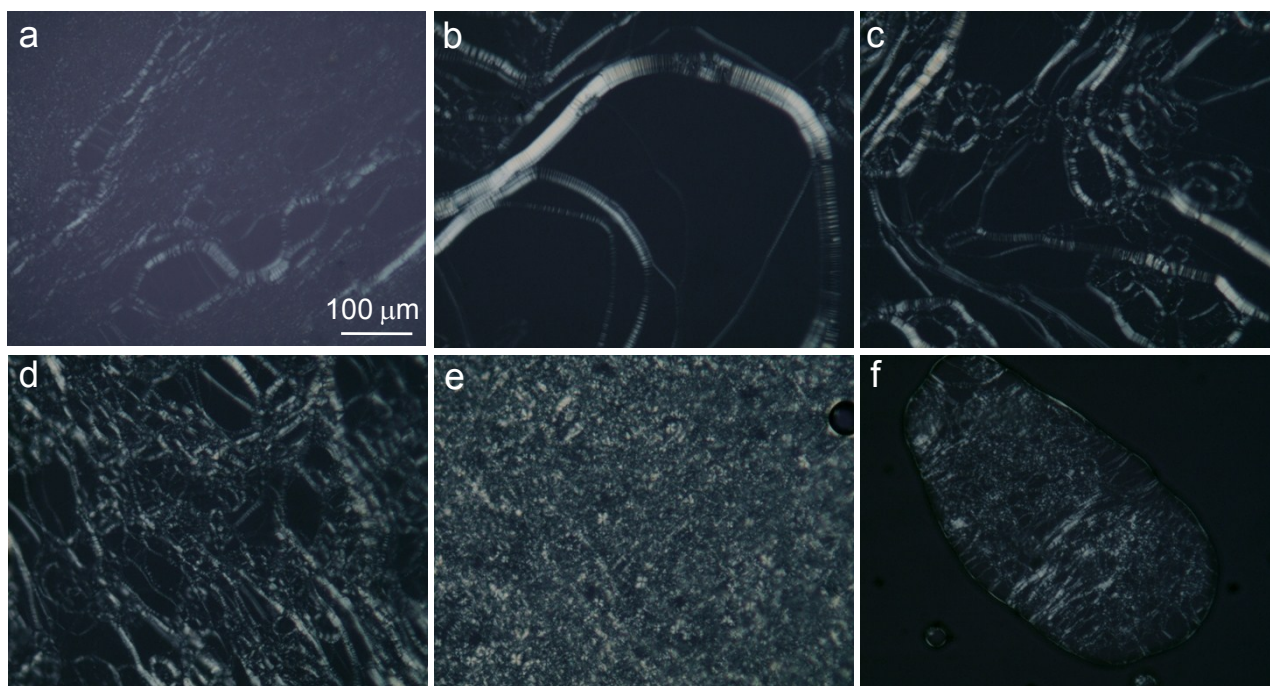

**Fig. S2** Polarized microscopy images of the samples with  $c_{TTA0}$  to be 40 wt% (a), 60 wt% (b), 70 wt% (c), 80 wt% (d), 90 wt% (e) and 100 wt% (f), respectively. The magnification of image b-f is the same with image a.

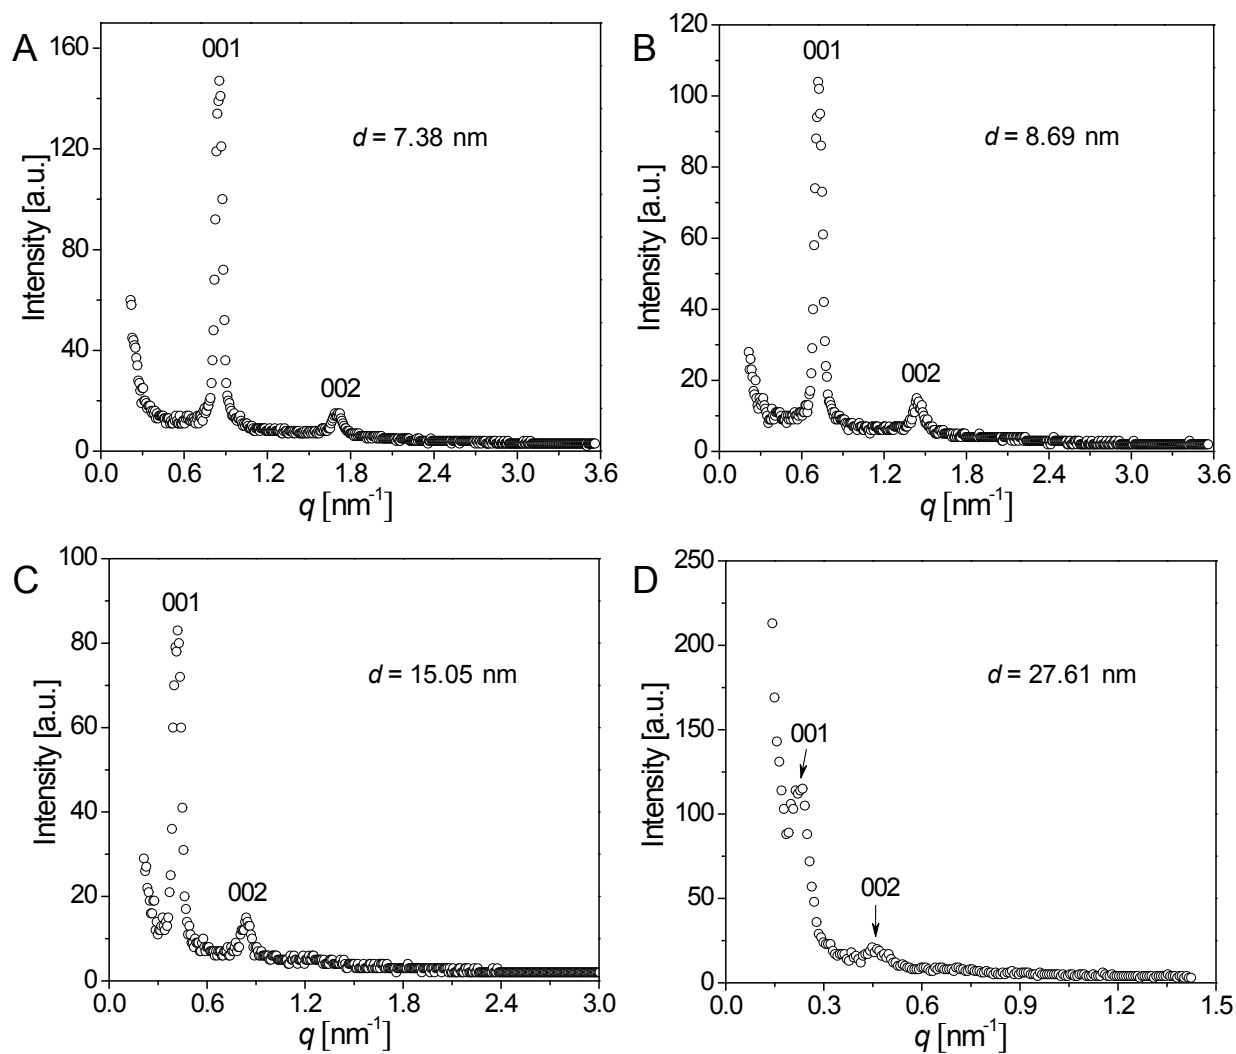

**Fig. S3** SAXS results of the LLCs formed by TTAO in water at 40 wt% (A), 30 wt% (B), 20 wt% (C) and 10 wt% (D), respectively.

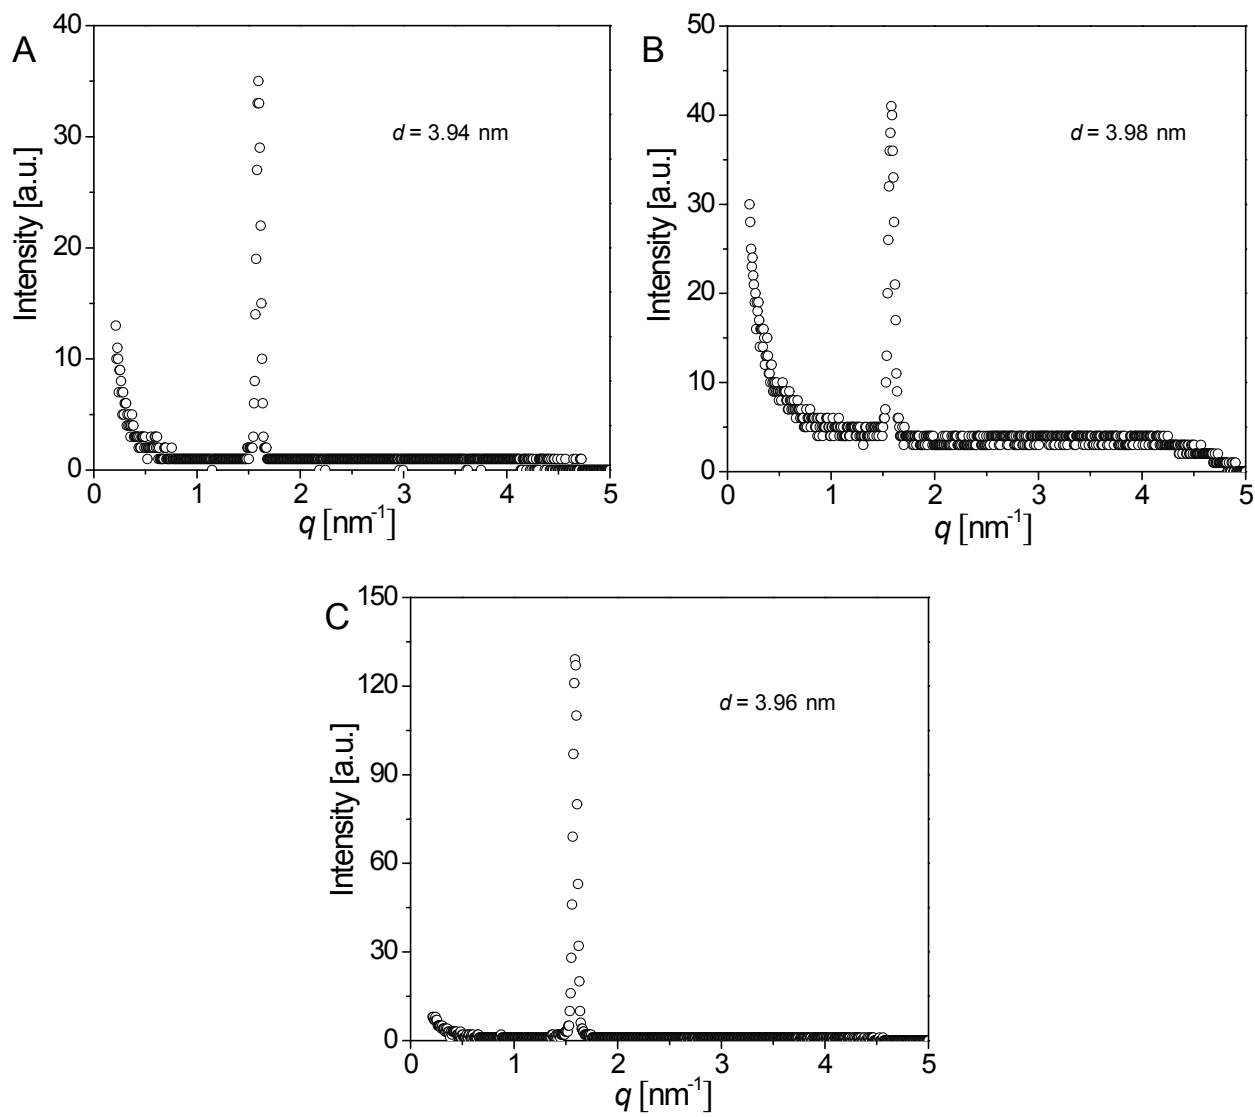

**Fig. S4** SAXS results of the LLCs formed by TTAO in water at 80 wt% (A), 90 wt% (B) and 95 wt% (C), respectively.

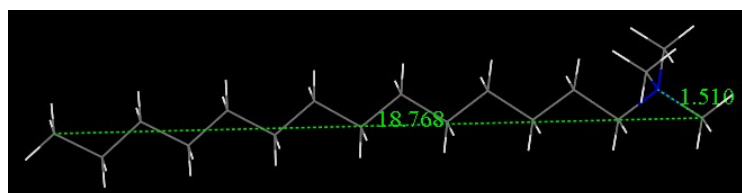

(A)

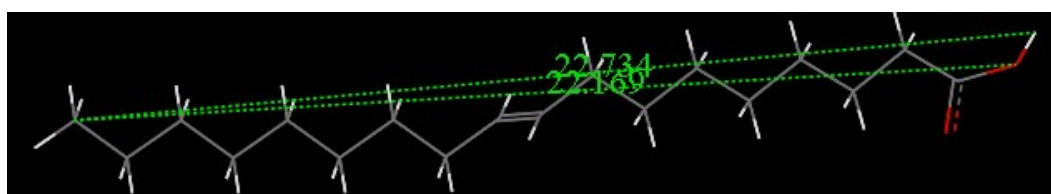

(B)

**Fig. S5** Optimized conformation of TTAOH (A) and OA (B) obtained by Material Studio.

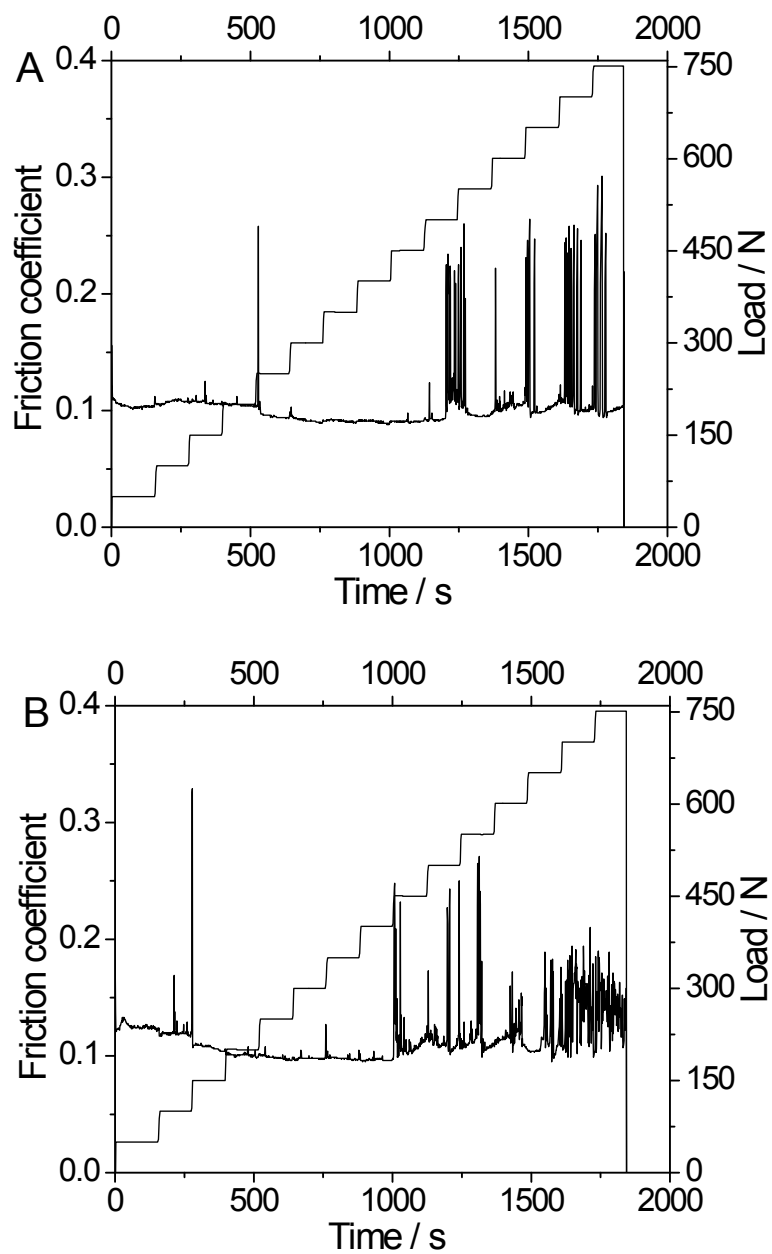

**Fig. S6** Variation of the friction coefficient as a function of applied load at a frequency of 25 Hz for the LLCs (80 wt%) without (A) and with  $C_{60}$  (B,  $W_{C60}/W_{TTAO} = 0.01$ ).

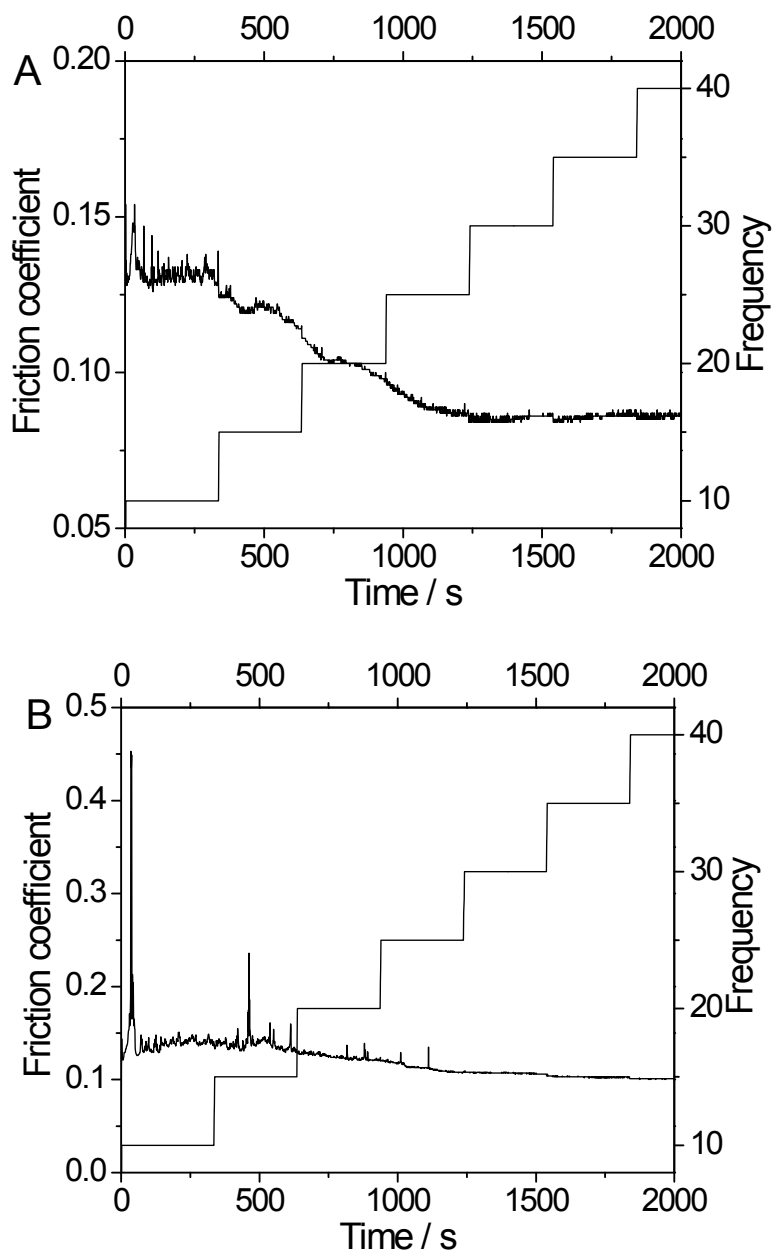

**Fig. S7** Variation of the friction coefficient as a function of applied frequency at a load of 100 N for the LLCs (80 wt%) without (A) and with  $C_{60}$  (B,  $W_{C60}/W_{TTAO} = 0.01$ ).



**Table S1.** Binding energies of typical elements from XPS measurements.

| $W_{C60}/W_{TTAO}$ | Binding Energy / eV |                |        |                |
|--------------------|---------------------|----------------|--------|----------------|
|                    | Fe                  | O              | N      | C              |
| 0                  | 710.62, 724.87      | 529.74, 531.74 | 399.99 | 284.87, 287.49 |
| 0.005              | 710.98, 724.72      | 529.97, 531.72 | 399.97 | 284.85, 287.60 |
| 0.01               | 711.15, 724.65      | 529.78, 531.65 | 399.65 | 284.78, 287.78 |
| 0.02               | 711.11, 724.48      | 529.98, 531.86 | 399.86 | 284.86, 288.36 |
